# Supplementary material for: Oral Health Status, Oral Health Behaviors, and Oral Health Care Utilization among Persons with Disabilities in Saudi Arabia
Source: MDPI journal article supplement (doi:10.3390/ijerph192416633), 2022-12-11
Supplement: s1 [file s1]

| Study                                                                                                                                                                                                                                                                              | Reason for exclusion         |
|------------------------------------------------------------------------------------------------------------------------------------------------------------------------------------------------------------------------------------------------------------------------------------|------------------------------|
| Shenkin, Jonathan D., Martin J. Davis, and Stephen B. Corbin. "The oral health of special needs children: dentistry's challenge to provide care." <i>Journal of Dentistry for Children</i> 68.3 (2001): 201-20.                                                                    | Non-Saudi population studied |
| Davidson, Natasha, et al. "Holes a plenty: oral health status a major issue for newly arrived refugees in Australia." <i>Australian dental journal</i> 51.4 (2006): 306-311.                                                                                                       | Non-Saudi population studied |
| Alkahtani, Zuhair M., et al. "Saudi and US dental student attitudes toward treating individuals with developmental disabilities." <i>Journal of Dental Education</i> 78.8 (2014): 1145-1153.                                                                                       | Patients not studied         |
| Vellappally, Sajith, et al. "The prevalence of malocclusion and its association with dental caries among 12-18-year-old disabled adolescents." <i>BMC oral health</i> 14.1 (2014): 1-7.                                                                                            | Non-Saudi population studied |
| AlHumaid, Jehan, et al. "Effectiveness of the D-TERMINED program of repetitive tasking for children with autism spectrum disorder." <i>Journal of Dentistry for Children</i> 83.1 (2016): 16-21.                                                                                   | Non-Saudi population studied |
| Sedky, Nabila A. "Assessment of oral and dental health status in children with cerebral palsy: An exploratory study." <i>International journal of health sciences</i> 12.1 (2018): 4.                                                                                              | Non-Saudi population studied |
| Alumran, Arwa, et al. "Are dental care providers in Saudi Arabia prepared to treat patients with special needs?." <i>Journal of Multidisciplinary Healthcare</i> 12 (2019): 281.                                                                                                   | Patients not studied         |
| Alshatrat, Sabha Mahmoud, Isra Abdelkarim Al-Bakri, and Wael Mousa Al-Omari. "Dental service utilization and barriers to dental care for individuals with autism spectrum disorder in Jordan: A case-control study." <i>International Journal of Dentistry</i> 2020 (2020).        | Non-Saudi population studied |
| Barry, Mohammed J., et al. "A comparison of salivary mercury levels in children with attention deficit/hyperactivity disorder when compared to age-matched controls: a case-control observational study." <i>The Journal of Contemporary Dental Practice</i> 21.2 (2020): 129-132. | Oral health not studied      |
| Abdulhaq, Ahmed, et al. "Tongue microbiome in children with autism spectrum disorder." <i>Journal of oral microbiology</i> 13.1 (2021): 1936434.                                                                                                                                   | Microbial study only         |
| Al Daajani, Manal Matar, et al. "Prevalence of Health Problems Targeted by the National School-Based Screening Program among Primary School Students in Saudi Arabia, 2019." <i>Healthcare</i> . Vol. 9. No. 10. MDPI, 2021.                                                       | Inappropriate methodology    |
| Alkhateeb, Alaa A., et al. "Untreated dental disease and lung transplant waitlist evaluation time for individuals with cystic fibrosis." <i>Special Care in Dentistry</i> 41.4 (2021): 489-497.                                                                                    | Non-Saudi population studied |

|                                                                                                                                                                                                                              |                              |
|------------------------------------------------------------------------------------------------------------------------------------------------------------------------------------------------------------------------------|------------------------------|
| Alshatrat, Sabha Mahmoud, et al. "Oral health knowledge and dental behavior among individuals with autism in Jordan: a case-control study." <i>BMC Oral Health</i> 21.1 (2021): 1-8.                                         | Non-Saudi population studied |
| Moin, Maria, et al. "Impact of oral health educational interventions on oral hygiene status of children with hearing loss: A randomized controlled trial." <i>BioMed research international</i> 2021 (2021).                 | Non-Saudi population studied |
| Aloufi, Abdullah, et al. "Factors determining the need for general anesthesia to deliver dental treatment for adults with intellectual and developmental disabilities." <i>Saudi Journal of Anaesthesia</i> 16.1 (2022): 24. | Oral health not studied      |
